# Supplementary material for: Dynamic neural representations of memory and space during human ambulatory navigation
Source: PubMed Central journal article supplement (PMC10589239; doi:10.1038/s41467-023-42231-4), 2023-10-20
Supplement: 41467_2023_42231_MOESM7_ESM.pdf [file 41467_2023_42231_MOESM7_ESM.pdf]

## Reporting Summary

Nature Portfolio wishes to improve the reproducibility of the work that we publish. This form provides structure for consistency and transparency in reporting. For further information on Nature Portfolio policies, see our [Editorial Policies](#) and the [Editorial Policy Checklist](#).

### Statistics

For all statistical analyses, confirm that the following items are present in the figure legend, table legend, main text, or Methods section.

- |                                     |                                                                                                                                                                                                                                                                                                |
|-------------------------------------|------------------------------------------------------------------------------------------------------------------------------------------------------------------------------------------------------------------------------------------------------------------------------------------------|
| n/a                                 | Confirmed                                                                                                                                                                                                                                                                                      |
| <input type="checkbox"/>            | <input checked="" type="checkbox"/> The exact sample size ( $n$ ) for each experimental group/condition, given as a discrete number and unit of measurement                                                                                                                                    |
| <input type="checkbox"/>            | <input checked="" type="checkbox"/> A statement on whether measurements were taken from distinct samples or whether the same sample was measured repeatedly                                                                                                                                    |
| <input type="checkbox"/>            | <input checked="" type="checkbox"/> The statistical test(s) used AND whether they are one- or two-sided<br><i>Only common tests should be described solely by name; describe more complex techniques in the Methods section.</i>                                                               |
| <input type="checkbox"/>            | <input checked="" type="checkbox"/> A description of all covariates tested                                                                                                                                                                                                                     |
| <input type="checkbox"/>            | <input checked="" type="checkbox"/> A description of any assumptions or corrections, such as tests of normality and adjustment for multiple comparisons                                                                                                                                        |
| <input type="checkbox"/>            | <input checked="" type="checkbox"/> A full description of the statistical parameters including central tendency (e.g. means) or other basic estimates (e.g. regression coefficient) AND variation (e.g. standard deviation) or associated estimates of uncertainty (e.g. confidence intervals) |
| <input type="checkbox"/>            | <input checked="" type="checkbox"/> For null hypothesis testing, the test statistic (e.g. $F$ , $t$ , $r$ ) with confidence intervals, effect sizes, degrees of freedom and $P$ value noted<br><i>Give <math>P</math> values as exact values whenever suitable.</i>                            |
| <input checked="" type="checkbox"/> | <input type="checkbox"/> For Bayesian analysis, information on the choice of priors and Markov chain Monte Carlo settings                                                                                                                                                                      |
| <input checked="" type="checkbox"/> | <input type="checkbox"/> For hierarchical and complex designs, identification of the appropriate level for tests and full reporting of outcomes                                                                                                                                                |
| <input type="checkbox"/>            | <input checked="" type="checkbox"/> Estimates of effect sizes (e.g. Cohen's $d$ , Pearson's $r$ ), indicating how they were calculated                                                                                                                                                         |

*Our web collection on [statistics for biologists](#) contains articles on many of the points above.*

### Software and code

Policy information about [availability of computer code](#)

Data collection

Data analysis

For manuscripts utilizing custom algorithms or software that are central to the research but not yet described in published literature, software must be made available to editors and reviewers. We strongly encourage code deposition in a community repository (e.g. GitHub). See the Nature Portfolio [guidelines for submitting code & software](#) for further information.

### Data

Policy information about [availability of data](#)

All manuscripts must include a [data availability statement](#). This statement should provide the following information, where applicable:

- Accession codes, unique identifiers, or web links for publicly available datasets
- A description of any restrictions on data availability
- For clinical datasets or third party data, please ensure that the statement adheres to our [policy](#)

## Human research participants

Policy information about [studies involving human research participants and Sex and Gender in Research](#).

|                             |                                                                                                                                                                                                                                                                                                                                                                                                                                                                                                                                                                                                                                                                                                                                                                                                                                                                                                                                |
|-----------------------------|--------------------------------------------------------------------------------------------------------------------------------------------------------------------------------------------------------------------------------------------------------------------------------------------------------------------------------------------------------------------------------------------------------------------------------------------------------------------------------------------------------------------------------------------------------------------------------------------------------------------------------------------------------------------------------------------------------------------------------------------------------------------------------------------------------------------------------------------------------------------------------------------------------------------------------|
| Reporting on sex and gender | Four female and two male participants participated in this study. Recruitment of participants from both male and female sex was part of the study design. Sex- and gender- based analyses were not performed given the small cohort size after subdividing by sex and gender. Additionally, sex- and gender-based analyses were not pursued given that there is was no a priori hypothesis of a difference in episodic memory neurophysiology across sex or gender. As such, results apply to both male and female sex.                                                                                                                                                                                                                                                                                                                                                                                                        |
| Population characteristics  | Six participants (33-54 years old) with pharmacoresistant epilepsy participated in the study. These participants were previously implanted with the FDA-approved NeuroPace responsive neurostimulator system (RNS System) for the treatment of their epilepsy. The selection of electrode placements for this procedure (which was performed for all participants before recruitment to this study) were determined by the clinical team based off of treatment criteria. More details can be found in Extended Data Table 1 of the manuscript.                                                                                                                                                                                                                                                                                                                                                                                |
| Recruitment                 | Participants were recruited via phone or email from a database of the University of California Los Angeles. As with any volunteer-based research study, there is a potential for introduction of a self-selection bias that is unavoidable. The recruitment process involved providing potential research participants with a complete overview of the experimental procedure, including the use of virtual reality while freely ambulating while completing an object-place learning paradigm. It is possible that individuals who felt more eager comfortable with navigation and spatial memory were more likely to participate in our study and this could introduce a potential bias impacting behavioral performance. However, it is worth noting that memory performance was highly varied across the six participants (more details in Figure 2) in the study and the effect of this potential bias is likely minimal. |
| Ethics oversight            | All participants volunteered for the study by providing informed consent according to a protocol approved by the UCLA Medical Institutional Review Board (IRB).                                                                                                                                                                                                                                                                                                                                                                                                                                                                                                                                                                                                                                                                                                                                                                |

Note that full information on the approval of the study protocol must also be provided in the manuscript.

## Field-specific reporting

Please select the one below that is the best fit for your research. If you are not sure, read the appropriate sections before making your selection.

Life sciences  Behavioural & social sciences  Ecological, evolutionary & environmental sciences

For a reference copy of the document with all sections, see [nature.com/documents/nr-reporting-summary-flat.pdf](https://www.nature.com/documents/nr-reporting-summary-flat.pdf)

## Life sciences study design

All studies must disclose on these points even when the disclosure is negative.

|                 |                                                                                                                                                                                                                                                                                                                                                                                                                                                                                                                                                                                                                                                                                                                                                                                                                                                                                    |
|-----------------|------------------------------------------------------------------------------------------------------------------------------------------------------------------------------------------------------------------------------------------------------------------------------------------------------------------------------------------------------------------------------------------------------------------------------------------------------------------------------------------------------------------------------------------------------------------------------------------------------------------------------------------------------------------------------------------------------------------------------------------------------------------------------------------------------------------------------------------------------------------------------------|
| Sample size     | Six participants (33-54 years old) with pharmacoresistant epilepsy participated in the study. Same size was determined in accordance with previous studies that reported similar effects in freely-moving participants with chronically-implanted NeuroPace RNS Systems (Aghajan et al., 2017, Current Biology; Stangl et al., 2021, Nature); the sample size selected in this study is similar (and greater than) in these prior studies. No statistical methods were used to pre-determine sample size. This sample size was chosen, and the experimental procedure performed individually for each participant, to enable data analyses not only on the group-level (across all recording channels from all participants), but also independently for each participant, in order to investigate the consistency of effects and their reliability across different participants. |
| Data exclusions | The data from all participants was used for data analyses. Each participant had 4 recording channels. Across all participants, a total of 19 channels were located in MTL regions including the hippocampus, entorhinal cortex, and perirhinal cortex. Recording channels outside of the MTL were excluded from main analyses but evaluated as a control comparison for main effects.                                                                                                                                                                                                                                                                                                                                                                                                                                                                                              |
| Replication     | The experimental procedure was repeated six times independently with six different participants. All methods used to perform this study and analyses needed to replicate the presented findings are detailed in the the Methods section of the manuscript. Data were analyzed on the group-level (across all recording channels from all participants), and across individual participants (averaging across a participant's individual recording channels). Main effects were successfully replicated in all individual participants, as reported in the manuscript.                                                                                                                                                                                                                                                                                                              |
| Randomization   | All participants were tested with the same experimental protocol with no separate experimental groups. The task was comprised of learning object positions in two separate environments. The starting environment during encoding for each participant was counterbalanced.                                                                                                                                                                                                                                                                                                                                                                                                                                                                                                                                                                                                        |
| Blinding        | We have tested a rare group of participants with pharmacoresistant epilepsy, who have been previously implanted with the NeuroPace RNS System for the treatment of their epilepsy. As such, all experiments were aware of this and not blinded with regards to the participants' condition.                                                                                                                                                                                                                                                                                                                                                                                                                                                                                                                                                                                        |

# Reporting for specific materials, systems and methods

We require information from authors about some types of materials, experimental systems and methods used in many studies. Here, indicate whether each material, system or method listed is relevant to your study. If you are not sure if a list item applies to your research, read the appropriate section before selecting a response.

## Materials & experimental systems

| n/a                                 | Involved in the study                                  |
|-------------------------------------|--------------------------------------------------------|
| <input checked="" type="checkbox"/> | <input type="checkbox"/> Antibodies                    |
| <input checked="" type="checkbox"/> | <input type="checkbox"/> Eukaryotic cell lines         |
| <input checked="" type="checkbox"/> | <input type="checkbox"/> Palaeontology and archaeology |
| <input checked="" type="checkbox"/> | <input type="checkbox"/> Animals and other organisms   |
| <input checked="" type="checkbox"/> | <input type="checkbox"/> Clinical data                 |
| <input checked="" type="checkbox"/> | <input type="checkbox"/> Dual use research of concern  |

## Methods

| n/a                                 | Involved in the study                                      |
|-------------------------------------|------------------------------------------------------------|
| <input checked="" type="checkbox"/> | <input type="checkbox"/> ChIP-seq                          |
| <input checked="" type="checkbox"/> | <input type="checkbox"/> Flow cytometry                    |
| <input type="checkbox"/>            | <input checked="" type="checkbox"/> MRI-based neuroimaging |

## Magnetic resonance imaging

### Experimental design

|                                 |                                                                                                                                           |
|---------------------------------|-------------------------------------------------------------------------------------------------------------------------------------------|
| Design type                     | MRI was used only to determine the localization of electrode contacts within the brain.                                                   |
| Design specifications           | MRI was used only for electrode contact localization; thus, participants did not perform an experimental task during MRI scanning.        |
| Behavioral performance measures | No behavioral performance measures were acquired or derived, since participants did not perform an experimental task during MRI scanning. |

### Acquisition

|                               |                                                                            |
|-------------------------------|----------------------------------------------------------------------------|
| Imaging type(s)               | structural                                                                 |
| Field strength                | 3 Tesla                                                                    |
| Sequence & imaging parameters | standard T1- and T2-weighted sequences                                     |
| Area of acquisition           | whole-brain                                                                |
| Diffusion MRI                 | <input type="checkbox"/> Used <input checked="" type="checkbox"/> Not used |

### Preprocessing

|                            |                                                                                                                                                                                                                                                                  |
|----------------------------|------------------------------------------------------------------------------------------------------------------------------------------------------------------------------------------------------------------------------------------------------------------|
| Preprocessing software     | MRI data were preprocessed using FSL (FMRIB Software Library, Oxford University, UK; v5.0.11) for image registration with the FLIRT function (default parameters), and ITK-SNAP (version 3.8.0) for visualization and manual segmentation of electrode contacts. |
| Normalization              | MRI images were not normalized.                                                                                                                                                                                                                                  |
| Normalization template     | MRI images were not normalized.                                                                                                                                                                                                                                  |
| Noise and artifact removal | No noise or artifact removal procedures were applied.                                                                                                                                                                                                            |
| Volume censoring           | Volume censoring was not applied.                                                                                                                                                                                                                                |

### Statistical modeling & inference

|                                                                           |                                                                                                                                  |
|---------------------------------------------------------------------------|----------------------------------------------------------------------------------------------------------------------------------|
| Model type and settings                                                   | No model-based analyses were performed using MRI data.                                                                           |
| Effect(s) tested                                                          | MRI was used only for electrode contact localization; thus, no task- or stimulus-related analyses were performed using MRI data. |
| Specify type of analysis:                                                 | <input checked="" type="checkbox"/> Whole brain <input type="checkbox"/> ROI-based <input type="checkbox"/> Both                 |
| Statistic type for inference<br>(See <a href="#">Eklund et al. 2016</a> ) | No statistical analyses were performed using MRI data.                                                                           |

Correction

No statistical analyses were performed using MRI data; thus, no correction methods were applied.

## Models & analysis

- n/a | Involved in the study
- Functional and/or effective connectivity
  - Graph analysis
  - Multivariate modeling or predictive analysis
